# Supplementary material for: RNAi-mediated gene knockdown of progesterone 5β-reductases in Digitalis lanata reduces 5β-cardenolide content
Source: PubMed Central journal article supplement (PMC8376734; doi:10.1007/s00299-021-02707-3), 2021-06-19

## Supplemental Material:

### RNAi-mediated gene knockdown of progesterone 5 $\beta$ -reductases in *Digitalis lanata* reduces 5 $\beta$ -cardenolide content and modifies stress responses.

Jan Klein<sup>a</sup>, Elisa Horn<sup>a</sup>, Mona Ernst<sup>a</sup>, Tim Leykauf<sup>a</sup>, Tamara Leupold<sup>a</sup>, Maja Dorfner<sup>a</sup>, Laura Wolf<sup>a</sup>, Anastasiia Ignatova<sup>a</sup>, Wolfgang Kreis<sup>a</sup>, Jennifer Munkert<sup>a,b</sup>

<sup>a</sup>Department of Biology, University of Erlangen-Nuremberg, 91058 Erlangen, Germany.

<sup>b</sup>Corresponding Author: jennifer.munkert@fau.de

#### Figure legends:

**Fig S1: Identification of T-DNA insertion into the plant genome.** Results of PCRs with genomic DNA from wildtype (wt/ WT) and transgenic (1, 2) *Digitalis lanata* shoots. (–) negative water control, (+) positive control – vector control or respectively agrobacterium culture (*virD2*). (a) Results of PCR against *virD2*; (b) Results of PCR against *spec*. No bacterial DNA including plasmid signals were detected in wildtype nor in transgenic shoots. (c) Results of PCR against *nptII*; (d) Results of PCR against *GUS* gene. In both cases signals were detected in transgenic, but not in wildtype shoots. (e, f) *nptII*-expression in transgenic *D. lanata* P5 $\beta$ R-RNAi knockdown shoots confirmed by PCR against cDNA. Expression of selection gene *nptII* was verified by PCR with cDNA of wildtype and transgenic shoots and primer system *nptII*. No expression of *nptII* was detected in wildtype (WT).

**Fig S2: RNAi cloning strategy.** Schematic diagram of recombination reactions with pHellsgate8 vector. PCR products flanked by attB sites are recombined with pDONR221 vector in a BP clonase reaction. The resulting clone in pDONR221 can be recombined with pHellsgate8 in an LR clonase reaction.

**Figure S3: Heterologous expression of CDS of DIP5 $\beta$ R2 in pDEST17 vector in *E. coli*.** (a) SDS-Page analysis of recombinant DIP5 $\beta$ R2 (1). Purified rDIP5 $\beta$ R2 protein has a size of about 43 kDa and was visualized with Coomassie-Brilliant-Blue R 250; (b) Immunoblot analysis of rDIP5 $\beta$ R2 (2) using anti-His antibodies (primary) and anti-mouse IgG-peroxidase antibodies (secondary). Chemiluminescence was used for detection. (M) Marker.

**Figure S4: Relative transcripts of *P5βRs* (*DIP5βR1* and *DIP5βR2*) in *D. lanata* WT shoots and shoots transformed with 679p935s-GusIo-rbs (VC).** 679p935s-GusIo-rbs transformed shoots were used as control to exclude artificial effects created by agrobacteria transformation process. The relative RNA expression levels were calculated by qPCR method by applying the  $2^{-\Delta\Delta CT}$  method using actin as reference gene. The y axis denotes the normalized relative transcript accumulation of the PRISE genes indicated in the x axis. (mean  $\pm$  SEM; n = 3).

**Figure S5: Progesterone and cardenolide levels in *DI* WT and stable transformed shoots of *D. lanata* including progesterone and 5β-pregnane-3,20-dione treatment and estimation of GSH levels.** (a,b) Effects of 5β-pregnane-3,20-dione (PR) treatment on cardenolide level in *D. lanata* WT shoots (a) and on GSH pool in *DI* WT and *DI P5βR-RNAi* knockdown lines calculated by measuring t-GSH and GSSG (b). (c) Progesterone (PO) was identified by GC-MS and quantified by UPLC.(d) Quantification of digoxigenin and digitoxigenin in *D. lanata* WT and *P5βR-RNAi* knockdown shoots after progesterone treatment. (e) Relative expression of *glutathione reductase (GR)* in *D. lanata* WT and *DI P5βR-RNAi* knockdown shoots either untreated or progesterone treated. RNA expression levels were calculated using the qPCR method by applying the  $2^{-\Delta\Delta CT}$  method with actin as the reference gene. The y axis denotes the normalized relative transcript accumulation of the *GR* in the individual lines indicated in the figure legend. (f) Decrease of progesterone and 5β-pregnane-3,20-dion level after feeding in the medium. (Mean  $\pm$  SEM are shown; n = 3).

**Figure S6: Detoxification mechanism of reactive electrophile species (RES) in planta.** Detoxification e.g. of MVK can either happen by reduction ((a); Chapellin et al., 2019) or via GST-catalyzed reaction forming a glutathione conjugate ((b); Yin et al., 2017)

**Figure S7: Gene expression of *Act*, *P5βR1* and *P5βR2* in *D. lanata* WT shoots.** PCR results for gene expression of *Act*, *P5βR1* and *P5βR2* in *D. lanata* WT shoots after treatment with 2 μmol/ L airvolume MVK or MEK diluted in potable water for 3 h. Control shoots were treated with pure potable water.

## Supplement Tables:

**Table S1: Primers used for the verification of T-DNA integration into *Digitalis lanata* genome.**

| Name              | Sequence in 5'-3' direction        | T <sub>A</sub> in ° C |
|-------------------|------------------------------------|-----------------------|
| <i>nptII</i> for: | TGA ATG AAC TGC AGG ACG AG         | 65                    |
| <i>nptII</i> rev: | AAT ATC ACG GGT AGC CAA CG         |                       |
| <i>GUS</i> for:   | GCA AAG TGT GGG TCA ATA AT         | 55                    |
| <i>GUS</i> rev:   | ATC ACA CTC TGT CTG GCT TT         |                       |
| <i>SmR</i> for:   | GGT CCA GAA CCT TGA CCG AA         | 57                    |
| <i>SmR</i> rev:   | CCA CGG AAT GAT GTC GTC GT         |                       |
| <i>virD2</i> for: | ATG CCC GAT CGA GCT CAA GT         | 55                    |
| <i>virD2</i> rev: | CCT GAC CCA AAC ATC TCG GCT GCC CA |                       |

**Table S2: Primer used for quantification of gene expression by qPCR in *Digitalis lanata*. Analyzed genes: *actin*, *P5βR1*, *P5βR2*, *glutathione-reductase (GR)*, and *glutathione S-transferase (GST)***

| Name                    | Sequence in 5'-3' direction | T <sub>A</sub> in ° C |
|-------------------------|-----------------------------|-----------------------|
| <i>EH_qDlAct</i> for:   | ATT CAG ATG CCC AGA AGT     | 62                    |
| <i>EH_qDlAct</i> rev:   | GGA GAT CCA CAT CTG CTG GAA |                       |
| <i>JK_qDlP5βR1</i> for: | TGC AAA CAC GAG GGA AAG GT  | 66                    |
| <i>JK_qDlP5βR1</i> rev: | AAG CCA TGC TCC TTG CTC TT  |                       |
| <i>JK_qDlP5βR2</i> for: | CTG CAG GAC ACA AAA CGG TG  | 66                    |
| <i>JK_qDlP5βR2</i> rev: | TCG TCC CAT ACC GAG TCC TT  |                       |
| <i>JK_qDlGR1</i> for:   | GGT AGG GCT CCA AAC ACG AA  | 66                    |
| <i>JK_qDlGR1</i> rev:   | TCC TCG CTG AGA CCA ACA AC  |                       |
| <i>JK_qDlGST1</i> for:  | GGT CCA TGG CAA CCC TAT CT  | 62                    |
| <i>JK_qDlGST1</i> rev:  | GCC TCA ACT TCA AGC CAC AC  |                       |

## Sequences:

>*D. lanata* GST (MT948956)

ATGGCAATCAAGGTCCATGGCAACCCTATCTCTGCTCCAACAAGGAGAGTTCTTCTGTGTCTAGCAGAGAAAAGAT  
GTCGAATACGAATATGTTACATAGATCTATTTACTGGTCAACACAAGAAAGAGCCCTTCATTTCAATCAACCCA  
TTTGGTCAAGTTCAGGTTTTGAAGATGGAGACTTGAATCTATTTGAATCAAGGGCAATCACCAAGTACATTGCT  
CATGCATATGCTGACAAGGGAATTCCTACTATTATCTGAAGATCCAAAGAAGATGGGAATCATCTCAGTGTGGCTT  
GAAGTTGAGGCCCAAAGATTTGAAGCTGCAGGGCAGAAGCTTAACATTGAAATAGTGATACATCCACTGATTGGG  
CAGACCACTGATGAGGCCAAAGTGGAAACAACCTCCAGGCCAACTGGCCTCAGTTCTTGATGTGTACGAAGCCCGG  
TTGGCCCAATCCAAGTACTTGGCAGGAGACTCCTACACACTTGCTGATCTTCATCATGTCCCTGTCATCAACAAC  
TTGATGCAGACAAAGATCAAGACATTGTTTCGATGAGCGTCCCCACGTGAGTGCCTGGTGCCTGATCTCTTGGCC  
CGTCCTGCTTGGCAGAAGGTTCTTGCATGGCTCAATAGTCAGTAA

>*D. lanata* Act-Fragment (MT948955)

TCCAATCCAAACACTGTACTTCCCTCTCTGGTGGTGCACAACCTTTATCTTCATGCTGCTAGGAGCCAATGCTGT  
GATTTCCCTTGCTCATAACGGTTCAGCAATACCAGGGAACATGGTTGAACCACCCTGAGGACAATATTACCATAGAG  
ATCCTTCCCTAATATCAACATCACACTTCATGATGGAGTTGTACGTAGTCTCATGGATTCCAGCTGCTTCCATGCC  
AGTTAAAGAAGGCTGGTATAGGACTTCTGGGCATCTGAATATCTTTCTAGAAGATCTCCTACAATATTCTCAGCT  
GCCATGGAAAATCGATGTTCTTCTTTTATTCTCTCAAGATTTTCAGGCTGTATATTAATAACTTATATTAAGAACT  
ATGCTAACCACCTCATCAGGAACCGTTGTAGGTGGCGTGGGTTTTCTTGGCAATCGACTCTCATGAAAACACGA  
GCTAAATATTCAATATGTTCCCTCTTGACCAACTTTATTCTGCATTTTTTTTTGAACGAGGTTTAGAGCAAGCTTCA  
GGAAAACCTGAGACAGGAATTTTATTAATAAATTTAAATTTTGAAGAAAGTTCAGGGTTAATAGCATCCATTTTTTG  
CTTTGCAAGTTCCCTA

>*D. lanata* P5 $\beta$ R1-Fragment (AY585867.1)

TGCAAACACGAGGGAAAGGTTTTGAGGTTTACTGGTTGTAAGGCTGCGTGGGATGGGTACTCGGATTGCTCTGAT  
GCGGATTTGATAGCGGAGCATCATATTTGGGCTGCAGTGGATCCTTATGCAAAAAACGAGGCCTTTAATGTGAGT  
AATGGAGATGTGTTTAAATGGAAGCATTTTTTGGAAGGTGTTGGCGGAGCAGTTTGGAGTAGGGTGTGGAGAGTAT  
GAAGAAGGGGTGGATTTGAAATTGCAGGATTTAATGAAGGGGAAGGAGCCGGTTTGGGAGGAAAATCGTGAGGGAG  
AATGGATTGACACCTACGAAACTGAAGGATGTCGGAATTTGGTGGTTTTGGTGATGTTATACTTGGGAATGAGTGT  
TTCCTGGATAGTATGAACAAGAGCAAGGAGCATGGCTT

>*D. lanata* P5 $\beta$ R2-Fragment (HM210089.1)

CTGCAGGACACAAAACGGTGTCTTAACATGGACAGTCCATCGCCCCGACTAATTTTCGGGTTCTCACCATGTAG  
TTTGATGAACATAGTCGCAACGCTAAGTGTGTTATGCCGCGATTTGCAAATATGAGAACAAGCCGTTGGTGTATAC  
CGGGACACAAAACGTCGTGGAATTTGTTTAGTGGATGCTGTGGATTTCGGATTTGTTATCAGAGCACTTGGTATGGGG  
TGCGATCAGCCCAAATGCGAAGAACCAAGCTTTCAATATCAACAATGGCGACGTTTTTAAATGGAAACATATATG  
GAAAGTGTGGCGGAGCAGCTTCAGCTTGAGATTGAGTTTGTGGGTTATGAAGGTAAGGAGCCGGTGTCTTTGGA  
GGGTCTCATGAAGGATAAGGACTCGGTATGGGACGA

>*D. lanata* GR-Fragment (MT948958)

GGTAGGGCTCCAACACGAAAAGGTTAAATCTGGAATCTGTAGGGGTTGAACTCGATAAATATGGAGCTGTGGTG  
GTTGATGATTACTCTCGAACCAAAGTACCTAGCATATGGGCCATAGGTGATGTTACAAACCGTATGAATCTTACT  
CCTGTTGCCTTAATGGAAGGAACCTGTTTTGCCAAAACCTGTGTTTCGGTGGGCAGCCTTCCAACACAGACTACGAC  
CATATTCCTTGCCTGTCTTCTGCATCCCACCACTTTCAGTTGTTGGTCTCAGCGAGGA

>*D. lanata* GST-Fragment

GGTCCATGGCAACCCTATCTCTGCTCCAACAAGGAGAGTTCTTCTGTGTCTAGCAGAGAAAAGATGTCGAATACGA  
ATATGTTACATAGATCTATTTACTGGTCAACACAAGAAAGAGCCCTTCATTTCAATCAACCCATTTGGTCAAGT  
TCCAGGTTTTGAAGATGGAGACTTGAATCTATTTGAATCAAGGGCAATCACCAAGTACATTGCTCATGCATATGC  
TGACAAGGGAATTCCTACTATTATCTGAAGATCCAAAGAAGATGGGAATCATCTCAGTGTGGCTTGAAGTTGAGGC

Fig. S1

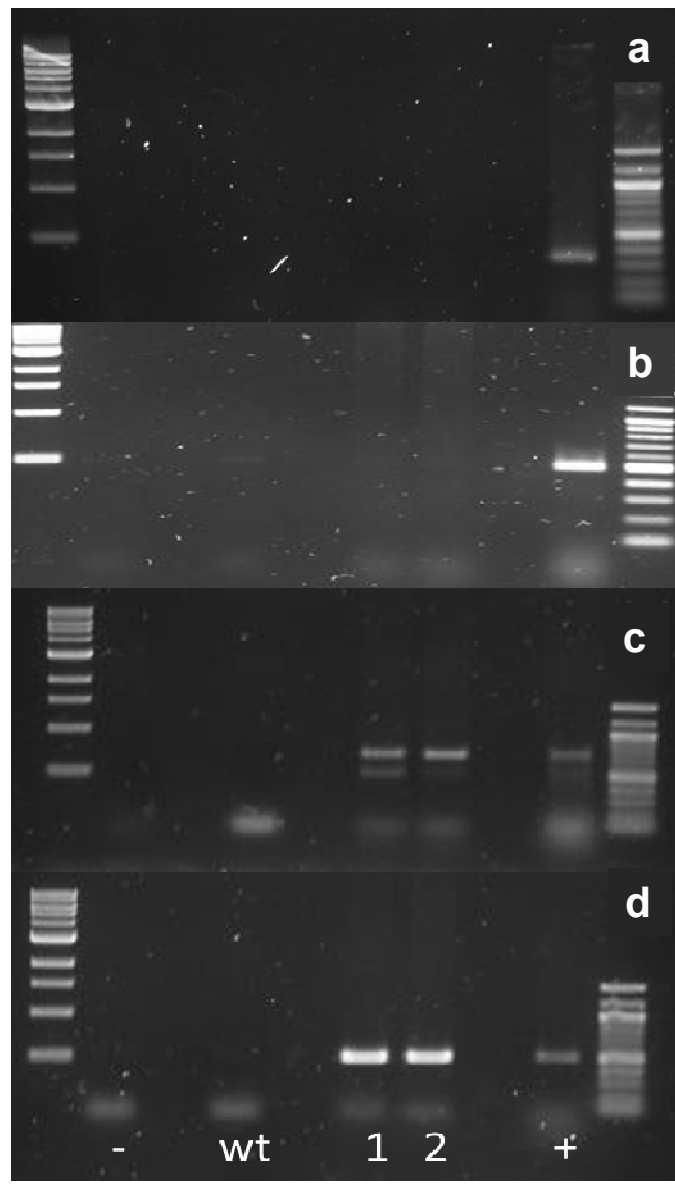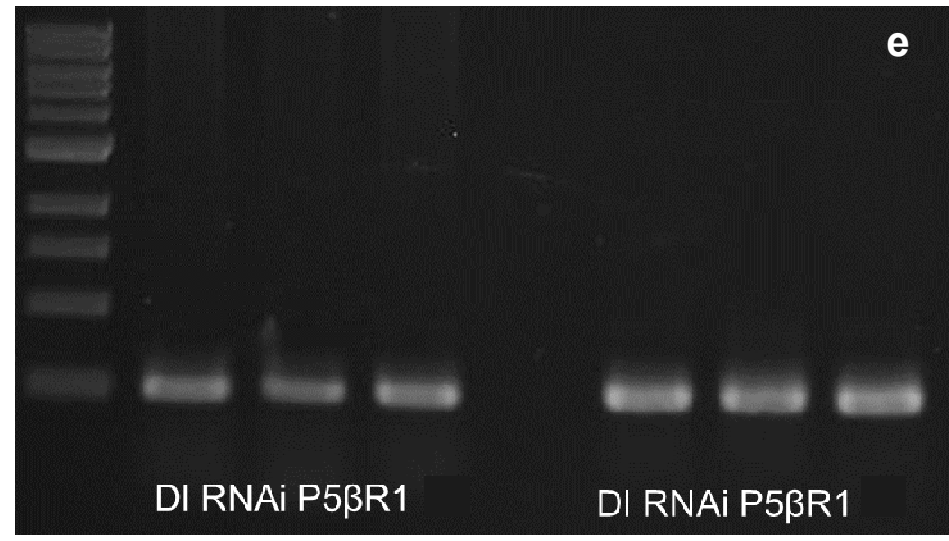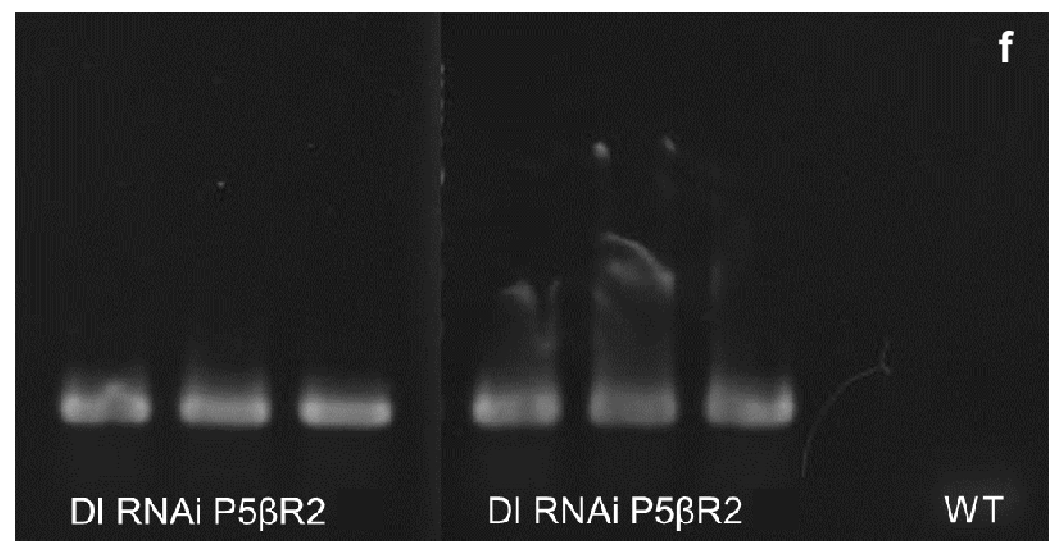

Fig. S2

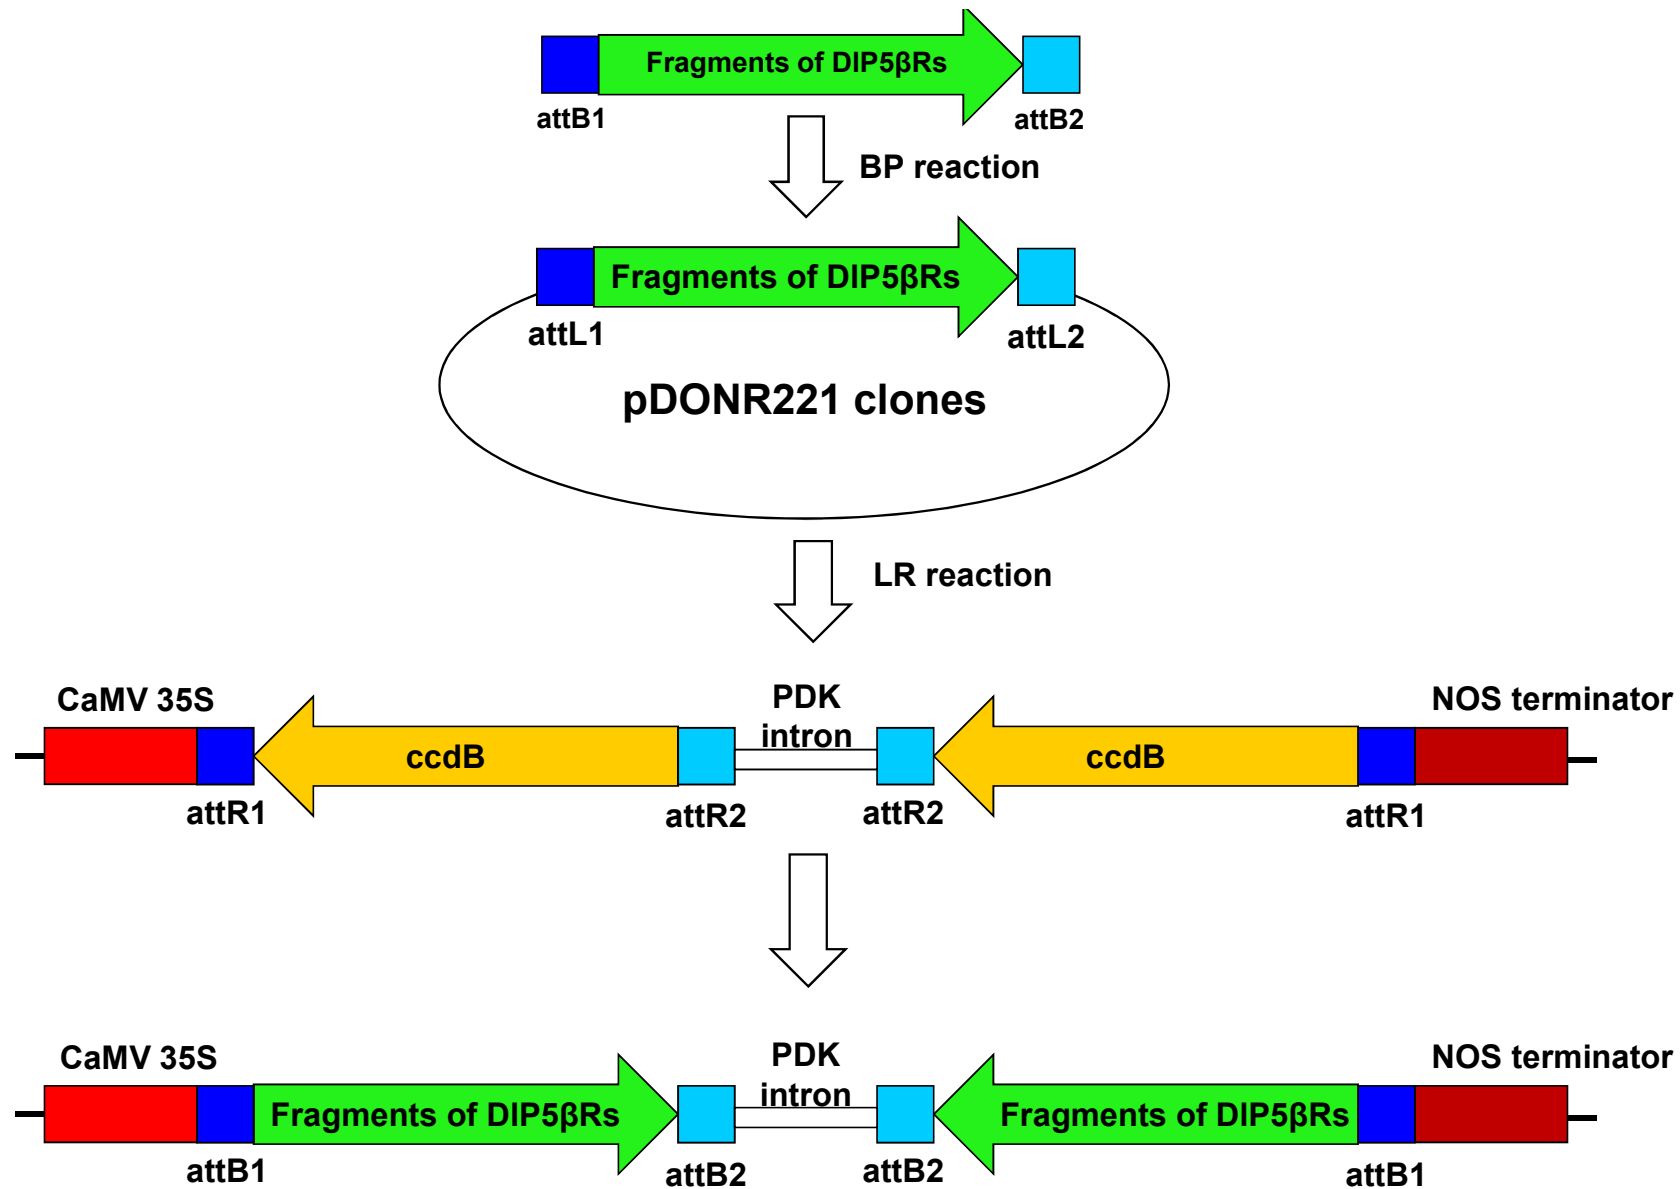

**Fig. S3**

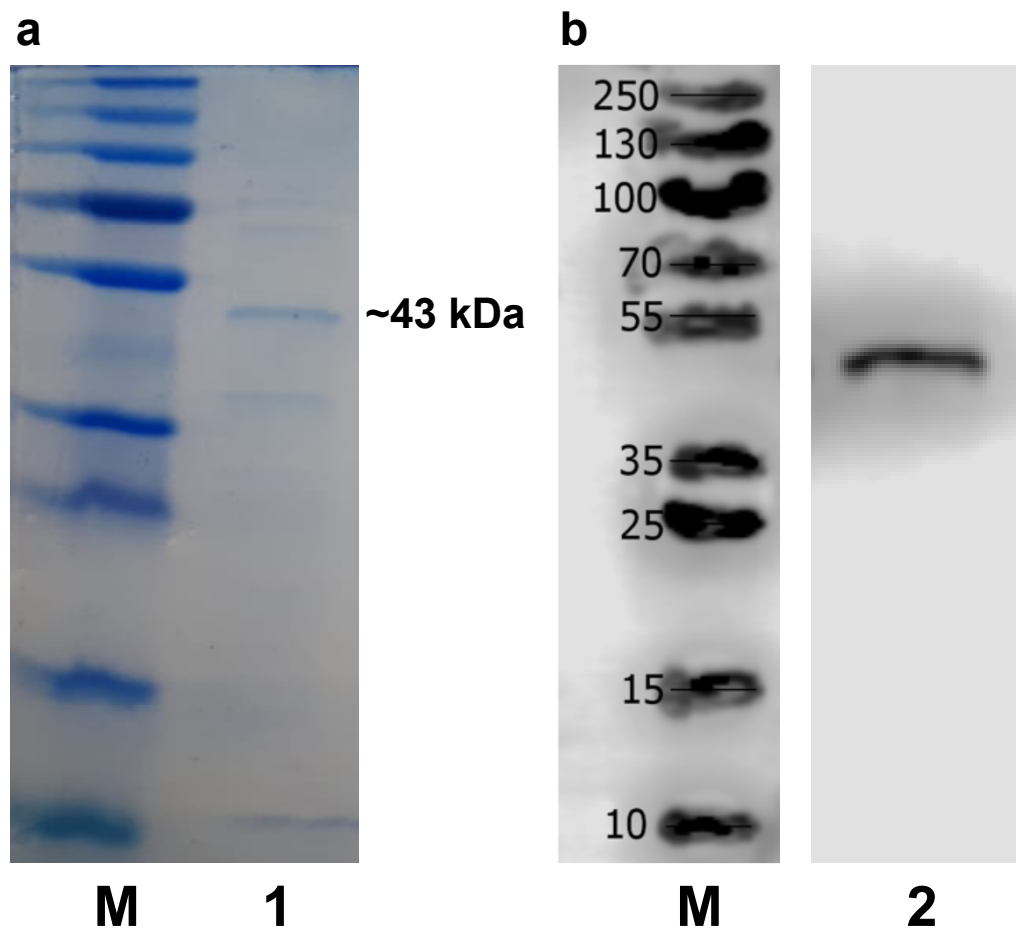

Fig. S4

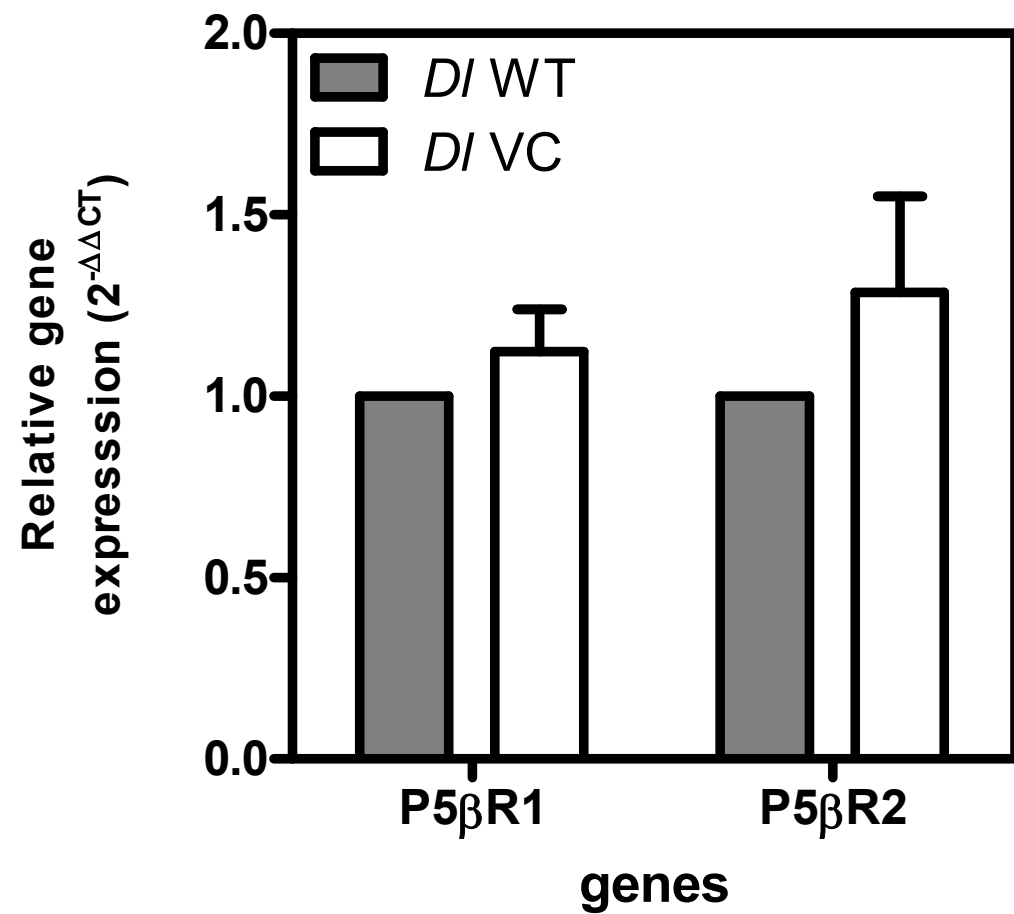



**Fig. S5**

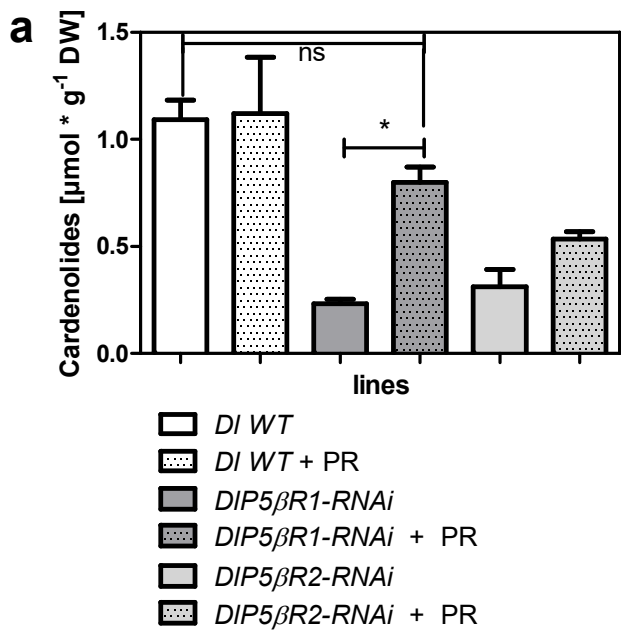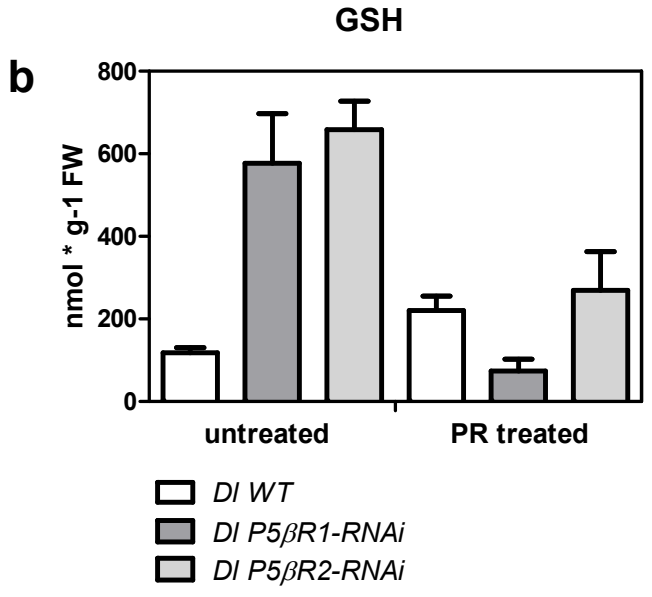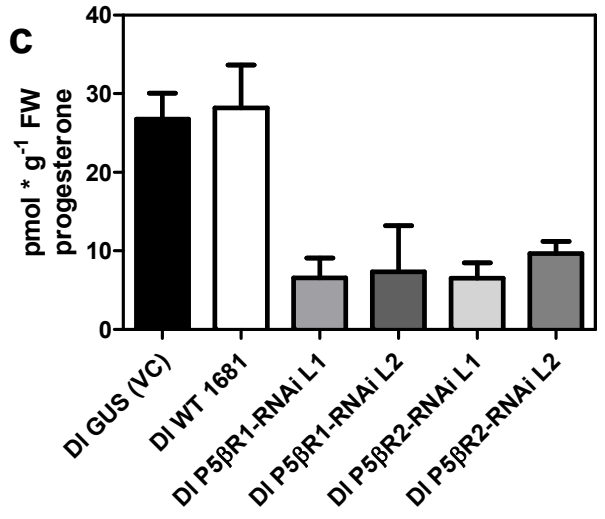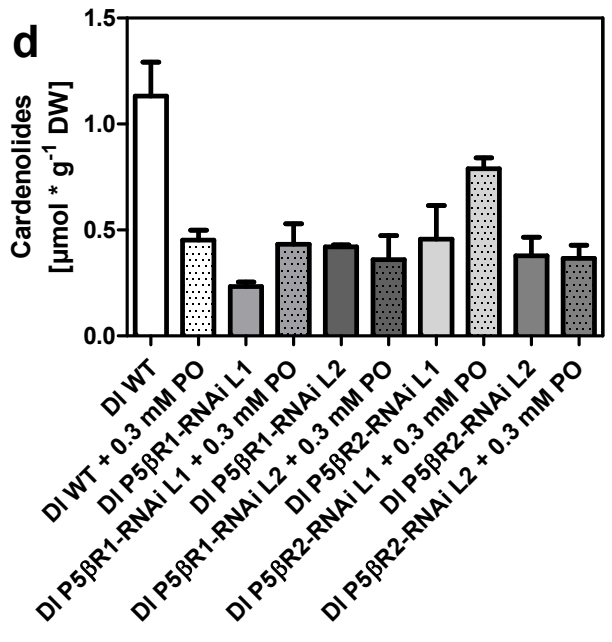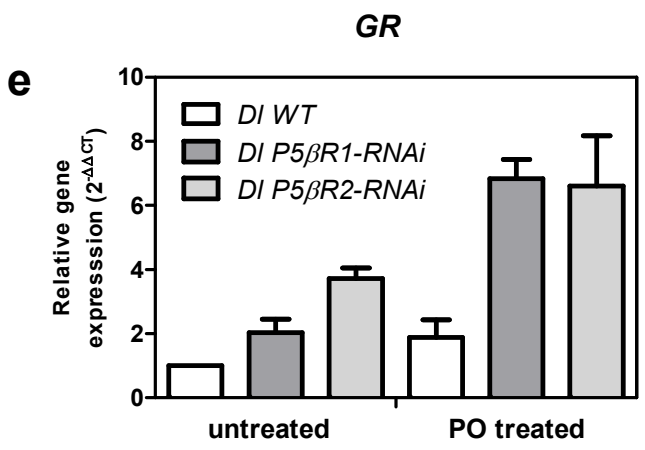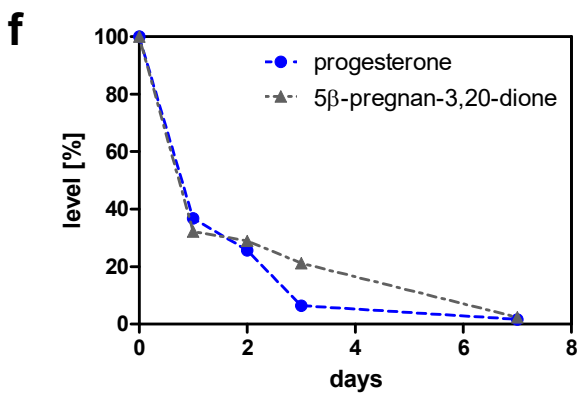

**Fig. S6**

**a**

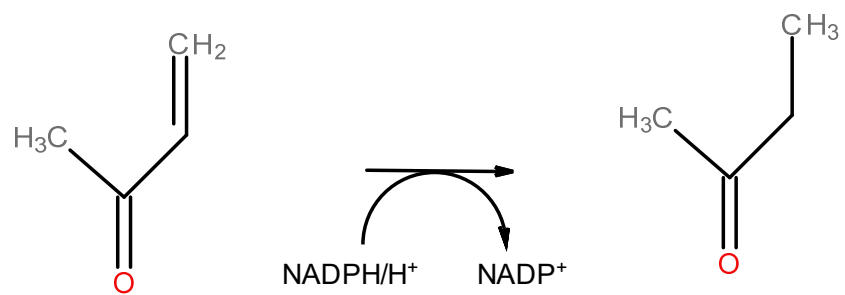

**b**

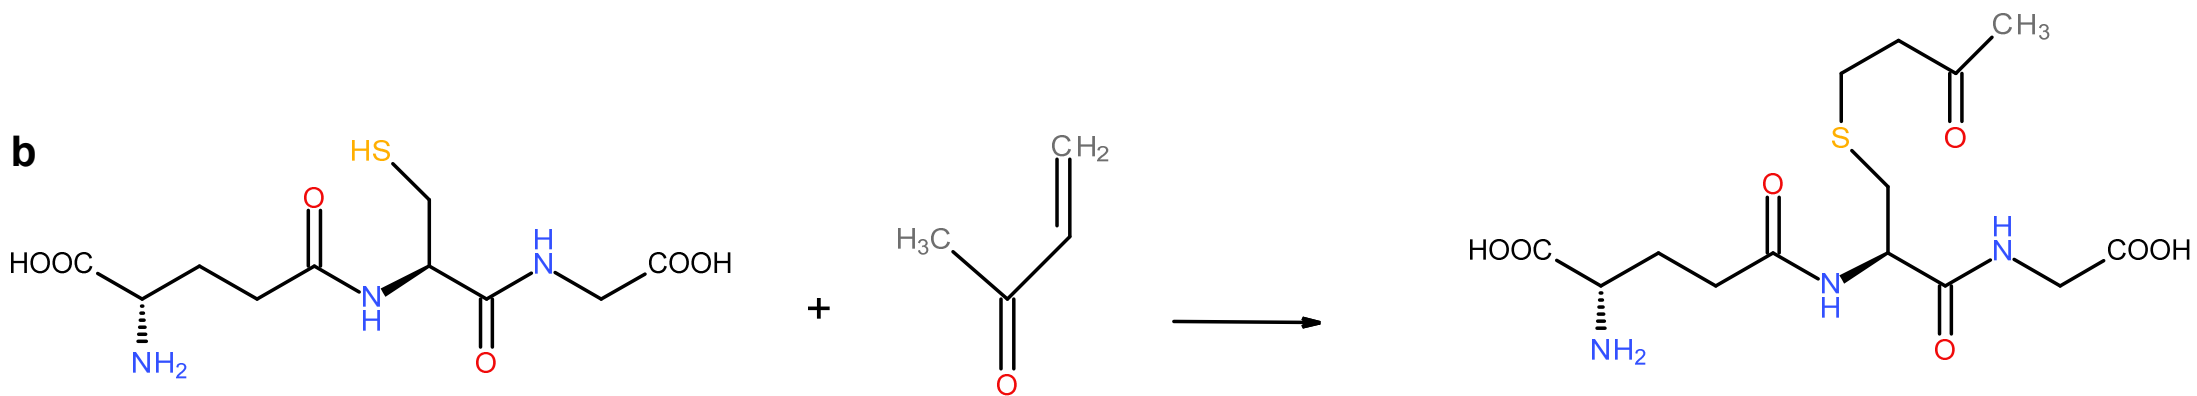

Fig. S7

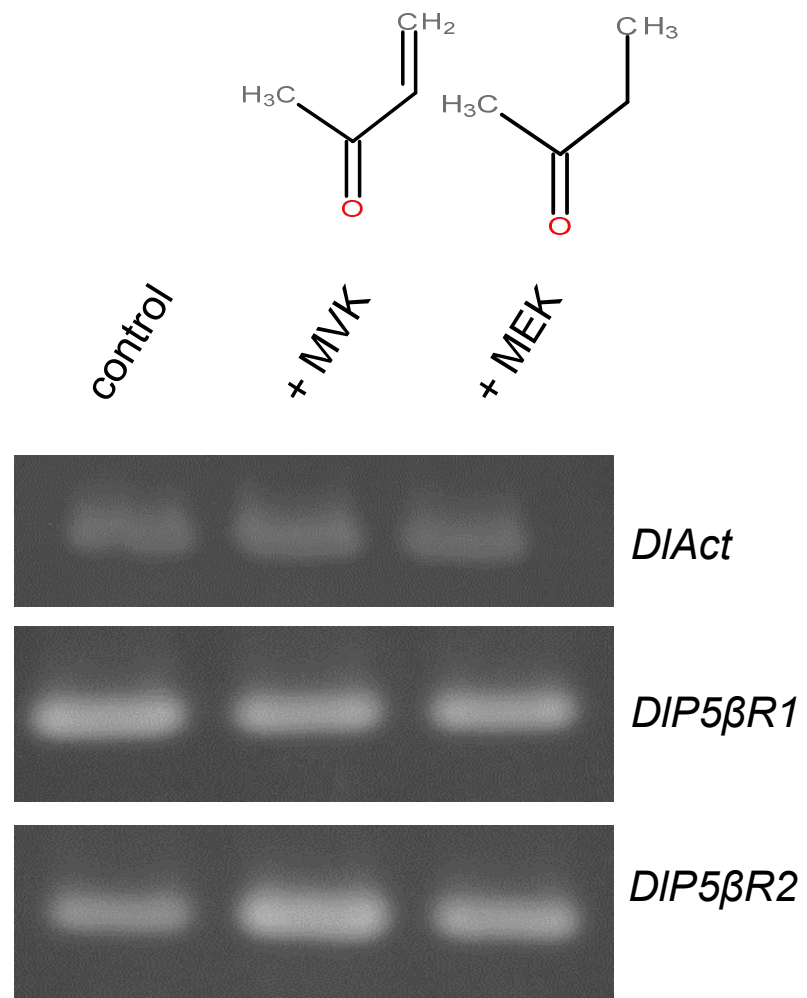

Supplement: 299_2021_2707_MOESM1_ESM.pdf [file 299_2021_2707_MOESM1_ESM.pdf]
